# Supplementary material
Source: PubMed Central journal article supplement (PMC7211140)
Supplement: NIHMS1067737-supplement-Supp_Fig_1.pdf [file NIHMS1067737-supplement-Supp_Fig_1.pdf]

Injection/Implantable

Transdermal

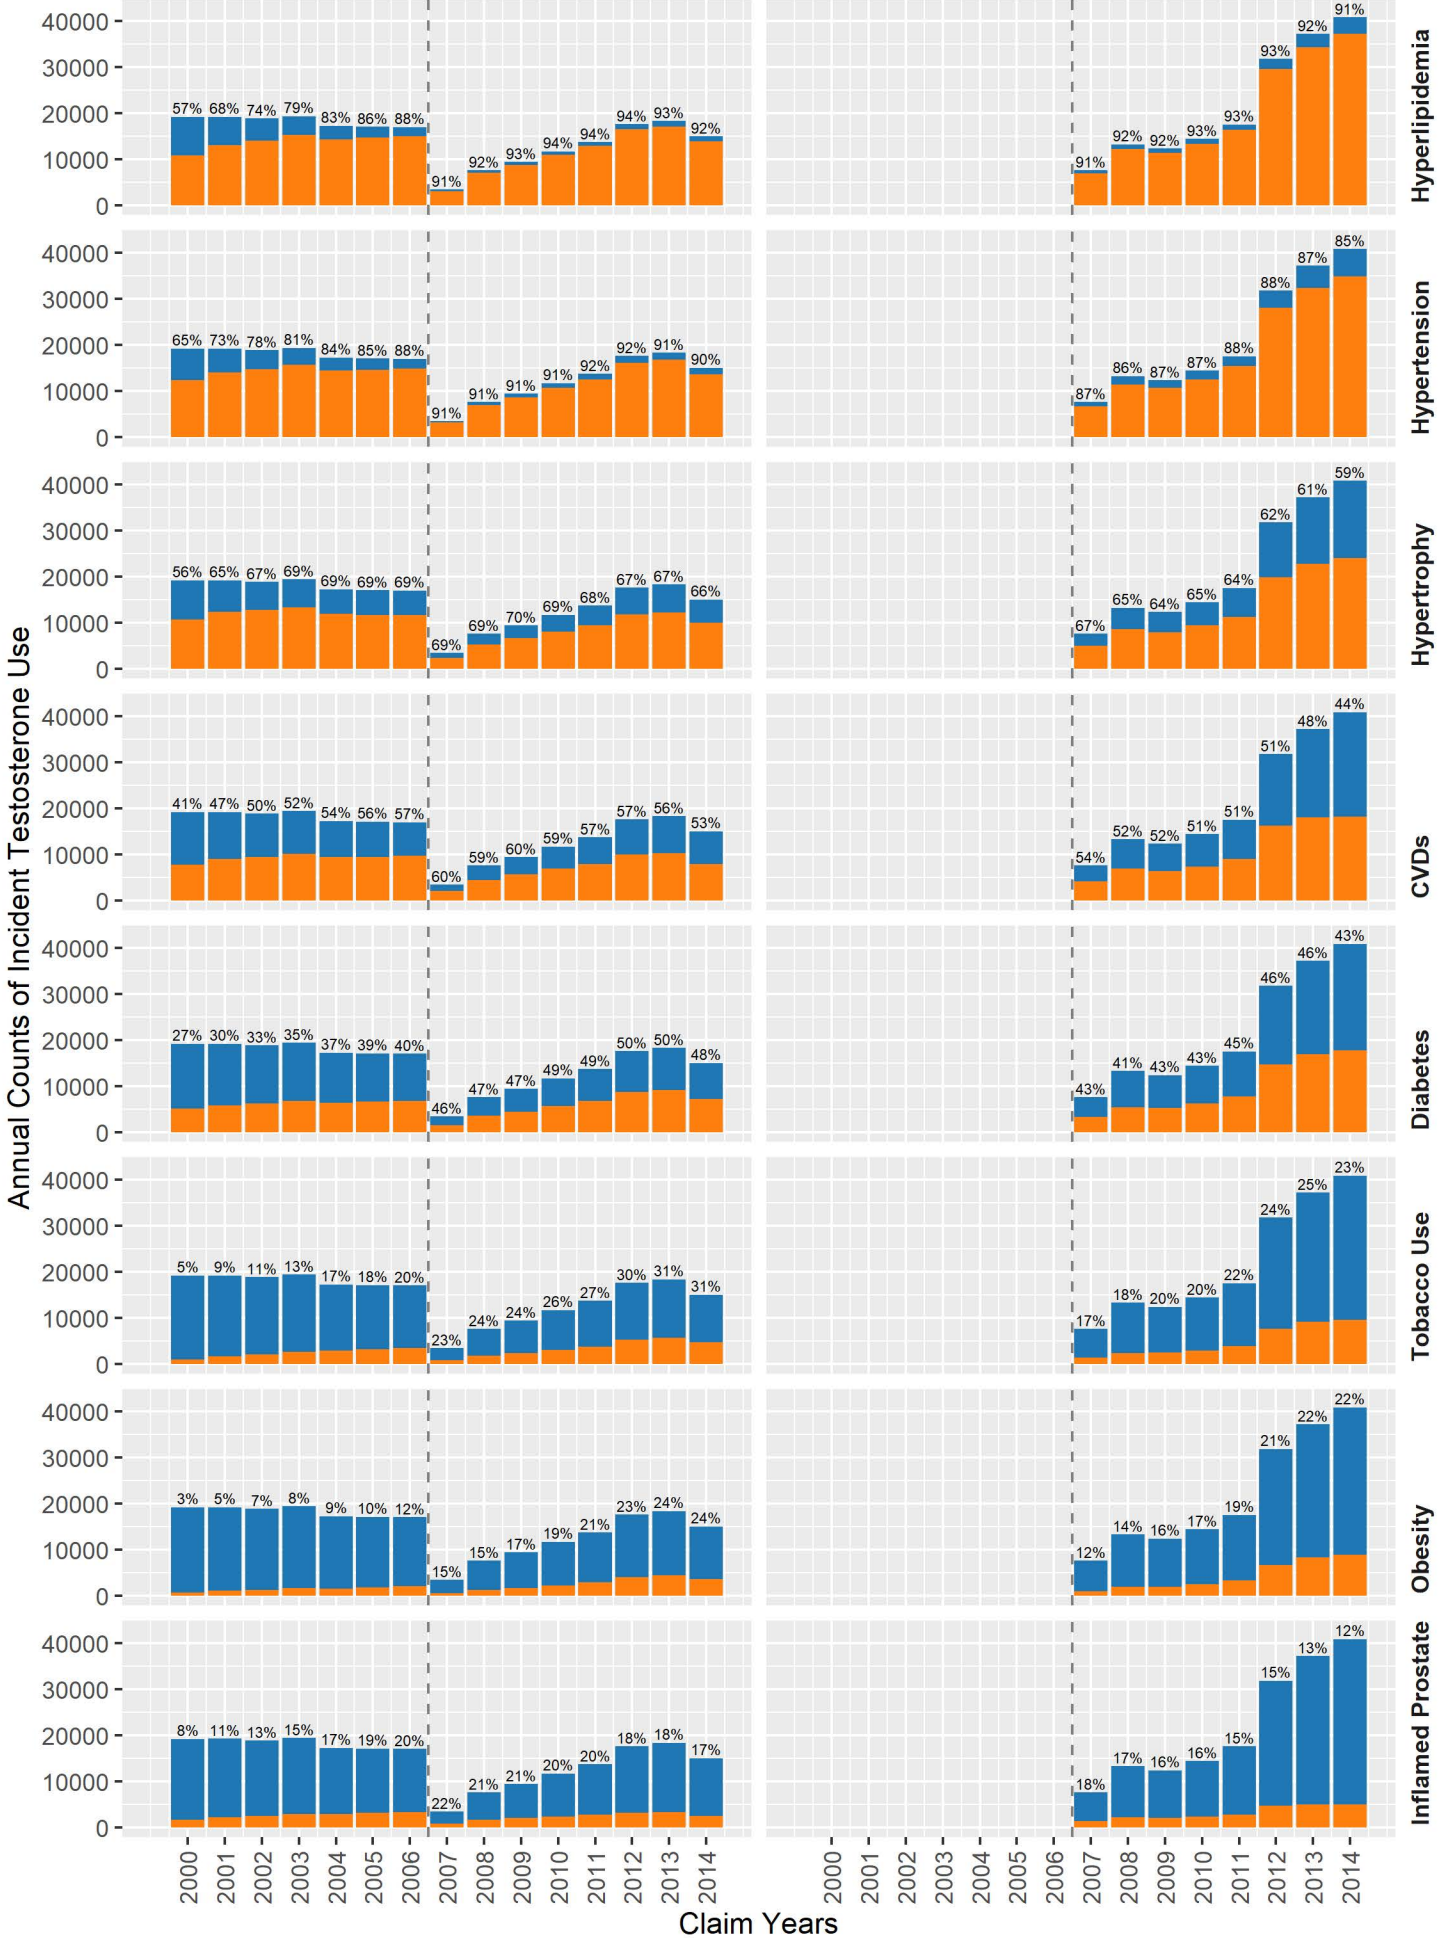

Had the condition preceding the first testosterone claim ■ No ■ Yes
