# Supplementary material
Source: PubMed Central journal article supplement (PMC7211140)
Supplement: NIHMS1067737-supplement-Supplemental_Tables.pdf [file NIHMS1067737-supplement-Supplemental_Tables.pdf]

**Table 1. Age-standardized incidence and prevalence of testosterone therapy by route of administration.**

| Claim year | Medication Type |       |            |       |                       |      |            |      |             |       |            |       |             |      |            |      |
|------------|-----------------|-------|------------|-------|-----------------------|------|------------|------|-------------|-------|------------|-------|-------------|------|------------|------|
|            | Any             |       |            |       | Injection/Implantable |      |            |      | Transdermal |       |            |       | Buccal/Oral |      |            |      |
|            | Incidence       |       | Prevalence |       | Incidence             |      | Prevalence |      | Incidence   |       | Prevalence |       | Incidence   |      | Prevalence |      |
|            | Number          | Rate  | Number     | Rate  | Number                | Rate | Number     | Rate | Number      | Rate  | Number     | Rate  | Number      | Rate | Number     | Rate |
| 1999       | –               | –     | 30,715     | 323   | –                     | –    | 30,715     | 323  | –           | –     | –          | –     | –           | –    | –          | –    |
| 2000       | 19,206          | 246   | 31,749     | 331   | 19,206                | 246  | 31,749     | 331  | –           | –     | –          | –     | –           | –    | –          | –    |
| 2001       | 19,223          | 242   | 32,469     | 326   | 19,223                | 242  | 32,469     | 326  | –           | –     | –          | –     | –           | –    | –          | –    |
| 2002       | 18,864          | 223   | 32,525     | 317   | 18,864                | 223  | 32,525     | 317  | –           | –     | –          | –     | –           | –    | –          | –    |
| 2003       | 19,383          | 224   | 33,021     | 316   | 19,383                | 224  | 33,021     | 316  | –           | –     | –          | –     | –           | –    | –          | –    |
| 2004       | 17,254          | 194   | 31,072     | 293   | 17,254                | 194  | 31,072     | 293  | –           | –     | –          | –     | –           | –    | –          | –    |
| 2005       | 17,100          | 192   | 30,438     | 285   | 17,100                | 192  | 30,438     | 285  | –           | –     | –          | –     | –           | –    | –          | –    |
| 2006       | 17,011          | 194   | 25,458     | 618   | 17,011                | 194  | 12,302     | 301  | –           | –     | 13,305     | 320   | –           | –    | 716        | 17   |
| 2007       | 10,915          | 753   | 29,061     | 706   | 3,405                 | 228  | 13,263     | 325  | 7,573       | 529   | 16,090     | 388   | 325         | 22   | 654        | 16   |
| 2008       | 20,513          | 719   | 32,959     | 780   | 7,622                 | 259  | 14,878     | 355  | 13,259      | 473   | 18,543     | 436   | 419         | 14   | 567        | 14   |
| 2009       | 21,310          | 724   | 36,444     | 850   | 9,430                 | 312  | 17,621     | 414  | 12,366      | 428   | 19,271     | 446   | 313         | 10   | 552        | 13   |
| 2010       | 25,463          | 812   | 43,190     | 978   | 11,695                | 367  | 21,625     | 493  | 14,412      | 466   | 22,312     | 502   | 265         | 8    | 431        | 10   |
| 2011       | 30,406          | 958   | 53,234     | 1,146 | 13,711                | 422  | 26,481     | 574  | 17,555      | 562   | 27,860     | 596   | 165         | 5    | 315        | 7    |
| 2012       | 47,865          | 1,428 | 80,793     | 1,592 | 17,601                | 511  | 33,955     | 675  | 31,835      | 961   | 49,031     | 960   | 168         | 5    | 268        | 5    |
| 2013       | 53,680          | 1,487 | 108,928    | 1,791 | 18,344                | 490  | 42,687     | 708  | 37,196      | 1,045 | 69,037     | 1,129 | 139         | 4    | 275        | 5    |
| 2014       | 54,505          | 1,207 | 96,898     | 1,497 | 15,019                | 325  | 36,956     | 576  | 40,889      | 911   | 61,668     | 947   | 123         | 3    | 191        | 3    |

Annual incidence and prevalence were age-adjusted to the 2000 US standard population.

Incidence was expressed per 100,000 person-years. Prevalence was expressed per 100,000 persons.

Calculation of prevalence from 2006 onwards and incidence from 2007 onwards were based on male beneficiaries who had Part A/B and Part D coverages.

**Supplemental Table 1. HCPCS (Health Care Procedure Coding System) drug administration codes in Medicare Part A and B for intramuscular injections and implantable pellets of testosterone therapy**

|       |                                       |
|-------|---------------------------------------|
| J0900 | testosterone enanthate, up to 1 cc    |
| J1060 | testosterone cypionate, up to 1 ml    |
| J1070 | testosterone cypionate, up to 100 mg  |
| J1080 | testosterone cypionate, up to 200 mg  |
| J3120 | testosterone enanthate, up to 100 mg  |
| J3130 | testosterone enanthate, up to 200 mg  |
| J3140 | testosterone suspension, up to 50 mg  |
| J3150 | testosterone propionate, up to 100 mg |
| S0189 | testosterone pellet, 75 mg            |

**Supplemental Table 2. U.S. Food and Drug Administration National Drug Codes in Medicare Part D for oral and transdermal testosterone prescriptions**

|              |                                      |
|--------------|--------------------------------------|
| 0002-1975-61 | topical, testosterone, 30mg/1.5ml    |
| 0002-1975-90 | topical, testosterone, 30mg/1.5ml    |
| 0245-0871-05 | topical, testosterone, 50mg/5g       |
| 0245-0871-35 | topical, testosterone, 50mg/5g       |
| 0245-0872-42 | topical, testosterone, 12.5mg/1      |
| 0603-7831-88 | topical, testosterone, 10mg/.5g      |
| 0832-1120-05 | topical, testosterone, 50mg/5g       |
| 0832-1120-35 | topical, testosterone, 50mg/5g       |
| 0832-1121-42 | topical, testosterone, 12.5mg/1      |
| 16590-853-30 | topical, testosterone, 50mg/5g       |
| 45802-116-02 | topical, testosterone, 12.5mg/1.25g  |
| 45802-116-39 | topical, testosterone, 12.5mg/1.25g  |
| 45802-116-65 | topical, testosterone, 12.5mg/1.25g  |
| 54868-6406-0 | topical, testosterone, 30mg/1.5ml    |
| 63481-183-16 | topical, testosterone, 10mg/.5g      |
| 63481-183-17 | topical, testosterone, 10mg/.5g      |
| 63481-183-18 | topical, testosterone, 10mg/.5g      |
| 0051-8425-30 | transdermal, testosterone, 10mg/g    |
| 0051-8450-30 | transdermal, testosterone, 10mg/g    |
| 0051-8462-30 | transdermal, testosterone, 16.2mg/g  |
| 0051-8462-31 | transdermal, testosterone, 16.2mg/g  |
| 0051-8462-33 | transdermal, testosterone, 16.2mg/g  |
| 0591-2921-02 | transdermal, testosterone, 10mg/g    |
| 0591-3216-30 | transdermal, testosterone, 10mg/g    |
| 0591-3217-30 | transdermal, testosterone, 10mg/g    |
| 21695-112-30 | transdermal, testosterone, 10mg/g    |
| 35356-758-30 | transdermal, testosterone, 50mg/5g   |
| 49884-418-72 | transdermal, testosterone, 25mg/2.5g |
| 49884-510-72 | transdermal, testosterone, 50mg/5g   |
| 50090-0875-0 | transdermal, testosterone, 50mg/5g   |
| 50090-1306-0 | transdermal, testosterone, 16.2mg/g  |
| 52544-076-60 | transdermal, testosterone, 2mg/d     |
| 52544-077-30 | transdermal, testosterone, 4mg/d     |
| 54569-5339-0 | transdermal, testosterone, 10mg/g    |
| 54569-5339-1 | transdermal, testosterone, 10mg/g    |
| 54569-5595-0 | transdermal, testosterone, 50mg/5g   |
| 54569-6337-0 | transdermal, testosterone, 16.2mg/g  |
| 54868-4792-0 | transdermal, testosterone, 10mg/g    |
| 54868-4810-0 | transdermal, testosterone, 10mg/g    |
| 54868-4989-0 | transdermal, testosterone, 50mg/5g   |
| 54868-5814-0 | transdermal, testosterone, 10mg/g    |
| 66887-001-05 | transdermal, testosterone, 50mg/5g   |
| 66993-934-30 | transdermal, testosterone, 50mg/5g   |
| 52244-030-60 | buccal, testosterone, 30mg/1         |

|              |                                  |
|--------------|----------------------------------|
| 55056-3060-1 | buccal, testosterone, 30mg/1     |
| 63481-239-01 | nasal, testosterone, 5.5mg/1     |
| 0115-1408-01 | oral, methyltestosterone, 10mg/1 |
| 0115-1408-03 | oral, methyltestosterone, 10mg/1 |
| 0115-1408-08 | oral, methyltestosterone, 10mg/1 |
| 0115-7037-01 | oral, methyltestosterone, 10mg/1 |
| 0187-0901-01 | oral, methyltestosterone, 10mg/1 |
| 0187-0902-01 | oral, methyltestosterone, 10mg/1 |
| 0832-0086-00 | oral, fluoxymesterone, 10mg/1    |
