# Supplementary material
Source: PubMed Central journal article supplement (PMC7211140)

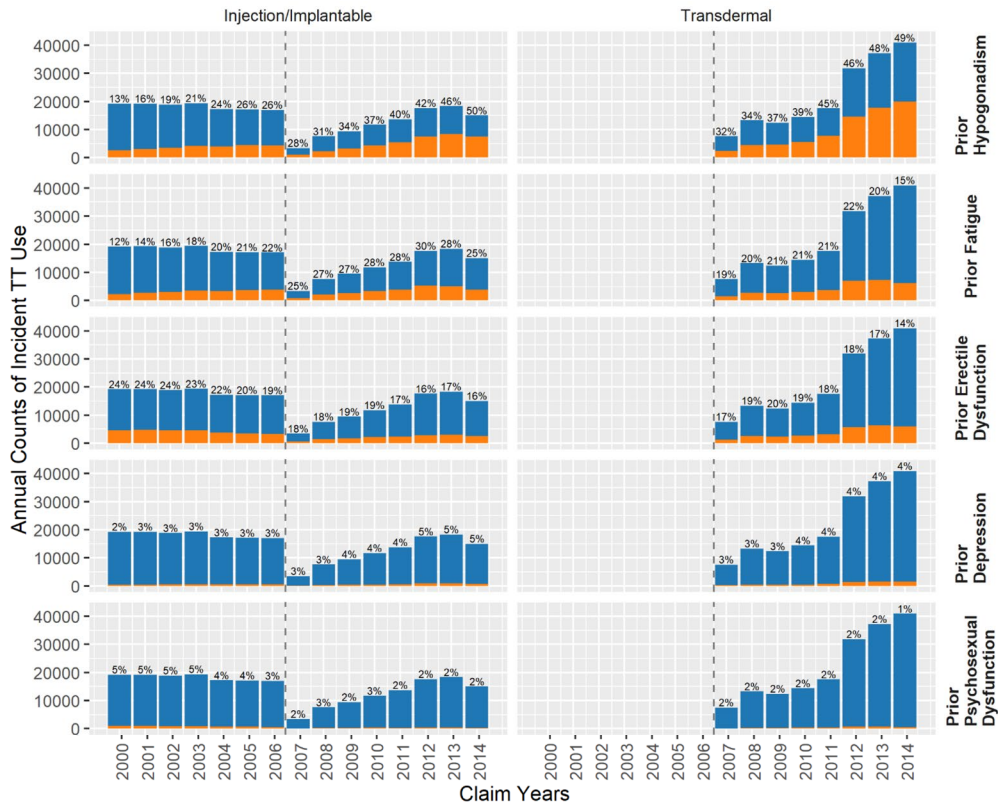

Had the condition in the designated period relative to incident TT use ■ No ■ Yes

Supplement: NIHMS1067737-supplement-Supp_Fig_2.pdf [file NIHMS1067737-supplement-Supp_Fig_2.pdf]
